# Supplementary material for: Effect of Electroacupuncture at Zusanli (ST36) on Sepsis Induced by Cecal Ligation Puncture and Its Relevance to Spleen
Source: Evid Based Complement Alternat Med. 2020 Oct 7;2020:1914031. doi: 10.1155/2020/1914031 (PMC7563055; doi:10.1155/2020/1914031)
Supplement: Supplementary Materials — Supplemental Table 1: the modulation effects on the plasma TNF-α, IL-10, DAO, and D-LA expression in CLP rats. Supplemental Table 2: the modulation effects on the CD3+CD4+/CD3+CD8+ levels in the intestinal lymph node in CLP rats. Supplemental Table 3: the modulation effects on Treg/Th17 levels in the intestinal lymph node in CLP rats. Supplemental Table 4: per-splenectomy takes part in the modulating process of Zusanli electroacupuncture on the plasma TNF-α, IL-10, DAO, and D-LA expression in CLP rats. Supplemental Table 5: spleen is not essential for acupuncture at ST36 in regulating the CD3+CD4+/CD3+CD8+ proportion in the intestinal lymph node. Supplemental Table 6: the effect of acupuncture at ST36 adjusting the ratio of Treg/Th17 in the intestinal lymph node is not dependent on the spleen. Supplemental Figure 1: CD3+CD4+ and CD3+CD8+ proportion in intestinal lymph node in CLP rats. Supplemental Figure 2: Th17 cells and Treg proportion in the intestinal lymph node in CLP rats. Supplemental Figure 3(a): CD3+CD4+ proportion in the intestinal lymph node in CLP rats and SPX + CLP rats. Supplemental Figure 3(b): CD3+CD8+ proportion in the intestinal lymph node in CLP rats and SPX + CLP rats. Supplemental Figure 4(a): Foxp3 proportion in the intestinal lymph node in CLP rats and SPX + CLP rats. Supplemental Figure 4(b): Th17 proportion in the intestinal lymph node in CLP rats and SPX + CLP rats. [file 1914031.f1.doc]

**Supplemental Table 1. The modulation eﬀects on plasma TNF-α, IL-10, DAO, and D-LA expression in CLP rats (mean ± SD).**

| Groups | Cytokines(ng/mL) | | Exudates(pg/mL) | |  |
| --- | --- | --- | --- | --- | --- |
| TNF-α | IL-10 | DAO | D-LA | |
| Sham | 23.27±1.96** | 18.01±2.25** | 177.22±34.35** | 28.31±3.63** | |
| CLP | 61.91±8.67 | 94.07±13.78 | 895.71±126.66 | 68.90±3.56 | |
| CLP + Zusanli | 31.27±3.53** | 71.16±15.75* | 492.86±39.51** | 39.54±2.72** | |
| CLP + Quchi | 32.92±2.24** | 63.87±9.27** | 510.00±19.15** | 39.78±1.60** | |
| CLP + Tianshu | 56.13±8.92 NS | 108.96±15.43 NS | 940.00±103.03 NS | 64.70±7.16 NS | |
| CLP + GTS21 | 29.44±9.00** | 20.87±4.29** | 378.67±73.20** | 33.32±5.16** |  |
| *F* | 37.17 | 58.76 | 89.36 | 93.68 |  |
| *P* | ﹤0.001 | ﹤0.001 | ﹤0.001 | ﹤0.001 |  |

Compared with CLP group: NS- no significant different; *-*P*＜0.05；**-*P*＜0.01.

**Supplemental Table 2. The modulation eﬀects on CD3+CD4+/ CD3+CD8+ levels in intestinal lymph node in CLP rats (mean ± SD).**

| Groups | Number | CD3+CD4+(%) | CD3+CD8+(%) | CD3+CD4+/  CD3+CD8+ |
| --- | --- | --- | --- | --- |
| Sham | 6 | 75.78±0.58** | 21.88±0.93** | 3.47±0.13** |
| CLP | 7 | 65.83±0.86 | 33.51±0.66 | 1.96±0.05 |
| CLP + Zusanli | 7 | 72.73±0.98** | 25.76±1.09** | 2.83±0.09** |
| CLP + Quchi | 5 | 71.38±0.70** | 27.72±1.24** | 2.58±0.12** |
| CLP + Tianshu | 7 | 73.54±1.18** | 24.47±0.83** | 3.01±0.09** |
| CLP + GTS21 | 5 | 78.92±1.34** | 19.82±1.56** | 4.01±0.37** |
| *F* |  | 125.36 | 130.80 | 112.26 |
| *P* |  | ＜0.001 | ＜0.001 | ＜0.001 |

Compared with CLP group: NS- no significant different; *-*P*＜0.05；**-*P*＜0.01.

**Supplemental Table 3. The modulation eﬀects on Treg/Th17 levels in intestinal lymph node in CLP rats (mean ± SD).**

| Groups | n | Treg(%) | Th17(%) | Treg/Th17 |
| --- | --- | --- | --- | --- |
| Sham | 6 | 4.81±0.64** | 2.62±0.14** | 1.84±0.29** |
| CLP | 7 | 1.09±0.21 | 7.53±1.70 | 0.15±0.05 |
| CLP + Zusanli | 7 | 2.99±0.25** | 3.48±0.24** | 0.86±0.09** |
| CLP + Quchi | 5 | 2.34±0.24** | 3.84±1.08** | 0.65±0.18** |
| CLP + Tianshu | 7 | 3.57±0.22** | 3.20±0.19** | 1.12±0.09** |
| CLP + GTS21 | 5 | 6.67±0.59** | 2.09±0.27** | 3.21±0.31** |
| *F* |  | 146.91 | 32.97 | 194.07 |
| *P* |  | ﹤0.001 | ﹤0.001 | ﹤0.001 |

Compared with CLP group: NS- no significant different; *-*P*＜0.05；**-*P*＜0.01.

**Supplemental Table 4. Per-splenectomy takes part in the modulating process of Zusanli electro-acupuncture on plasma TNF-α, IL-10, DAO, and D-LA expression in CLP rats (mean ± SD).**

| Groups | Cytokines(ng/mL) | | Exudates(pg/mL) | | |  |
| --- | --- | --- | --- | --- | --- | --- |
| TNF-α | IL-10 | | DAO | D-LA | |
| Sham | 23.27±1.96## | 18.01±2.25## | | 177.22±34.35## | 28.31±3.63## | |
| CLP | 61.91±8.67# | 94.07±13.78## | | 895.71±126.66ns | 68.90±3.56## | |
| CLP + Zusanli | 31.27±3.53## | 71.16±15.75## | | 492.86±39.51## | 39.54±2.72## | |
| CLP + GTS21 | 29.44±9.00## | 20.87±4.29## | | 378.67±73.20## | 33.32±5.16## | |
| SPX + CLP | 75.64±7.60 | 129.10±15.41 | | 1030.56±113.11 | 76.61±3.40 | |
| SPX + CLP + Zusanli | 66.35±11.02ns | 126.59±18.15ns | | 1068.89±96.51ns | 70.37±3.23# | |
| SPX + CLP + GTS21 | 30.73±3.62## | 42.98±10.29## | | 555.56±75.44## | 35.39±1.01## | |
| *F* | 55.45 | 75.24 | | 94.21 | 227.62 | |
| *P* | ﹤0.001 | ﹤0.001 | | ﹤0.001 | ﹤0.001 | |

Compared with SPX+CLP group: ns- no significant different; #-P＜0.05；##-P＜0.01.

**Supplemental Table 5. Spleen is not essential for Zusanli acupuncture therapy in regulating CD3+CD4+/ CD3+CD8+ proportion in intestinal lymph node.**

| Groups | Number | CD3+CD4+(%) | CD3+CD8+(%) | CD3+CD4+/ CD3+CD8+ |
| --- | --- | --- | --- | --- |
| Sham | 6 | 75.78±0.58## | 21.88±0.93## | 3.46±0.13## |
| CLP | 7 | 65.83±0.86# | 33.51±0.66## | 1.96±0.05# |
| CLP + Zusanli | 7 | 72.73±0.98## | 25.76±1.09## | 2.83±0.09## |
| CLP + GTS21 | 5 | 78.92±1.34## | 19.82±1.56## | 4.01±0.37## |
| SPX + CLP | 6 | 64.15±0.75 | 38.57±3.21 | 1.67±0.13 |
| SPX + CLP + Zusanli | 6 | 68.43±0.71## | 31.25±0.59## | 2.19±0.04## |
| SPX + CLP + GTS21 | 6 | 68.95±0.58## | 31.71±0.58## | 2.17±0.04## |
| *F* |  | 228.15 | 119.09 | 185.35 |
| *P* |  | ﹤0.001 | ﹤0.001 | ﹤0.001 |

Compared with SPX+CLP group: ns- no significant different; #-P＜0.05；##-P＜0.01.

**Supplemental Table 6. The effect of Zusanli acupuncture therapy that adjusting the ratio of Treg/Th17 in intestinal lymph node is not dependent on spleen.**

| Groups | Number | Treg(%) | Th17(%) | Treg/Th17 |
| --- | --- | --- | --- | --- |
| Sham | 6 | 4.81±0.64## | 2.62±0.14## | 1.84±0.29## |
| CLP | 7 | 1.09±0.21# | 7.53±1.70## | 0.15±0.05ns |
| CLP + Zusanli | 7 | 2.99±0.25## | 3.48±0.24## | 0.86±0.09## |
| CLP + GTS21 | 5 | 6.67±0.59## | 2.09±0.27## | 3.21±0.31## |
| SPX + CLP | 6 | 0.31±0.45 | 9.46±0.94 | 0.04±0.05 |
| SPX + CLP + Zusanli | 6 | 1.60±0.43## | 4.87±0.46## | 0.33±0.10# |
| SPX + CLP + GTS21 | 6 | 1.88±0.20## | 4.69±0.79## | 0.41±0.09## |
|  |  | 163.30 | 57.43 | 271.22 |
| *P* |  | ﹤0.001 | ﹤0.001 | ﹤0.001 |

Compared with SPX+CLP group: ns- no significant different; #-P＜0.05；##-P＜0.01.

**Supplemental Figure 1. CD3+CD4+ and CD3+CD8+ proportion in intestinal lymph node in CLP rats.**

**A.**

CLP + GTS21

Sham

CLP

CLP + Zusanli

CLP + Quchi

CLP + Tianshu

Sham

CLP

CLP + Zusanli

**B.**

CLP + Quchi

CLP + GTS21

CLP + Tianshu

**Figure 4. (A & B)**

**Supplemental Figure 2. Th17** **cells and Treg proportion in intestinal lymph node in CLP rats.**

Sham

CLP

CLP + Zusanli

**A.**

CLP + Quchi

CLP + Tianshu

CLP + GTS21

Sham

CLP

CLP + Zusanli

**B.**

CLP + Tianshu

CLP + GTS21

CLP + Quchi

**Supplemental Figure 3A. CD3+CD4+ proportion in intestinal lymph node in CLP rats and SPX+CLP rats.**

Sham

CLPP

CLP + Zusanli

CLP

CLP + GTS21

SPX + CLP

SPX + CLP + Zusanli

SPX + CLP + GTS21

**Supplemental Figure 3B. CD3+CD8+ proportion in intestinal lymph node in CLP rats and SPX+CLP rats.**

Sham

CLPP

CLP + Zusanli

CLP + GTS21

SPX + CLP

SPX + CLP + Zusanli

SPX + CLP + GTS21

**Supplemental Figure 4A. Foxp3 proportion in intestinal lymph node in CLP rats and SPX+CLP rats.**

Sham

CLPP

CLP + Zusanli

CLP + GTS21

SPX + CLP

SPX + CLP + Zusanli

SPX + CLP + GTS21

**Supplemental Figure 4B. Th17 proportion in intestinal lymph node in CLP rats and SPX+CLP rats.**

Sham

CLPP

CLP + Zusanli

CLP + GTS21

SPX + CLP

SPX + CLP + Zusanli

SPX + CLP + GTS21
